# Supplementary material for: Stress-induced tip engineering of micro-hyperbolic structures for enhanced liquid repellency
Source: Royal Society of Chemistry journal article supplement (doi:10.1039/d5ra06077j), 2025-01-01
Supplement: d5ra06077j1.pdf [file d5ra06077j1.pdf]

## Supplementary Information

# Stress-Induced Tip Engineering of Micro-Hyperbolic Structures for Enhanced Liquid Repellency

Chorong Kim<sup>† a</sup>, Yoonjin Lee<sup>† a</sup>, Jaekyoung Kim<sup>† a</sup>, Ji Hoon Kim<sup>\* b</sup> and Hyunsik Yoon<sup>\* a, b</sup>

<sup>a</sup>Department of Chemical and Biomolecular Engineering, Seoul National University of Science and Technology, Seoul, 01811, Republic of Korea

<sup>b</sup>Energy and Environment Research Institute, Seoul National University of Science and Technology, Seoul, 01811, Republic of Korea

<sup>†</sup>Equal contributions

\*Correspondence: [jubro@seoultech.ac.kr](mailto:jubro@seoultech.ac.kr)

\*\*Correspondence: [hsyoon@seoultech.ac.kr](mailto:hsyoon@seoultech.ac.kr)

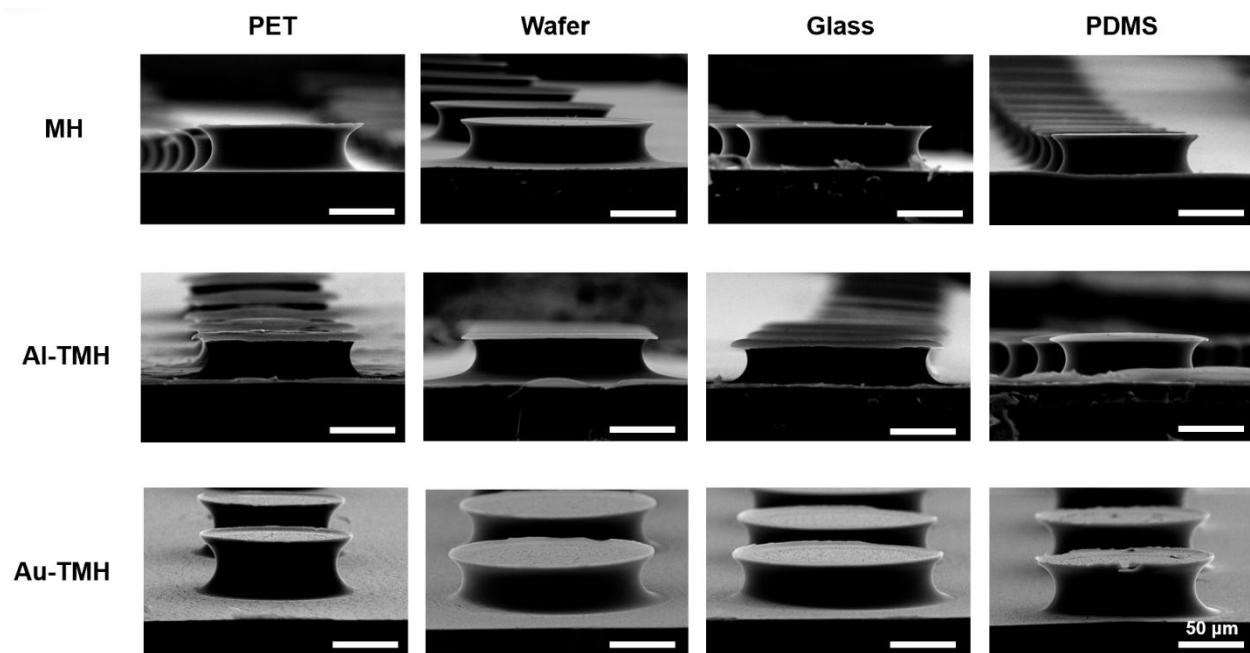

**Figure S1.** Cross-sectional SEM images of MH, Al-TMH, and Au-TMH structures fabricated on PET, wafer, glass, and PDMS substrates.

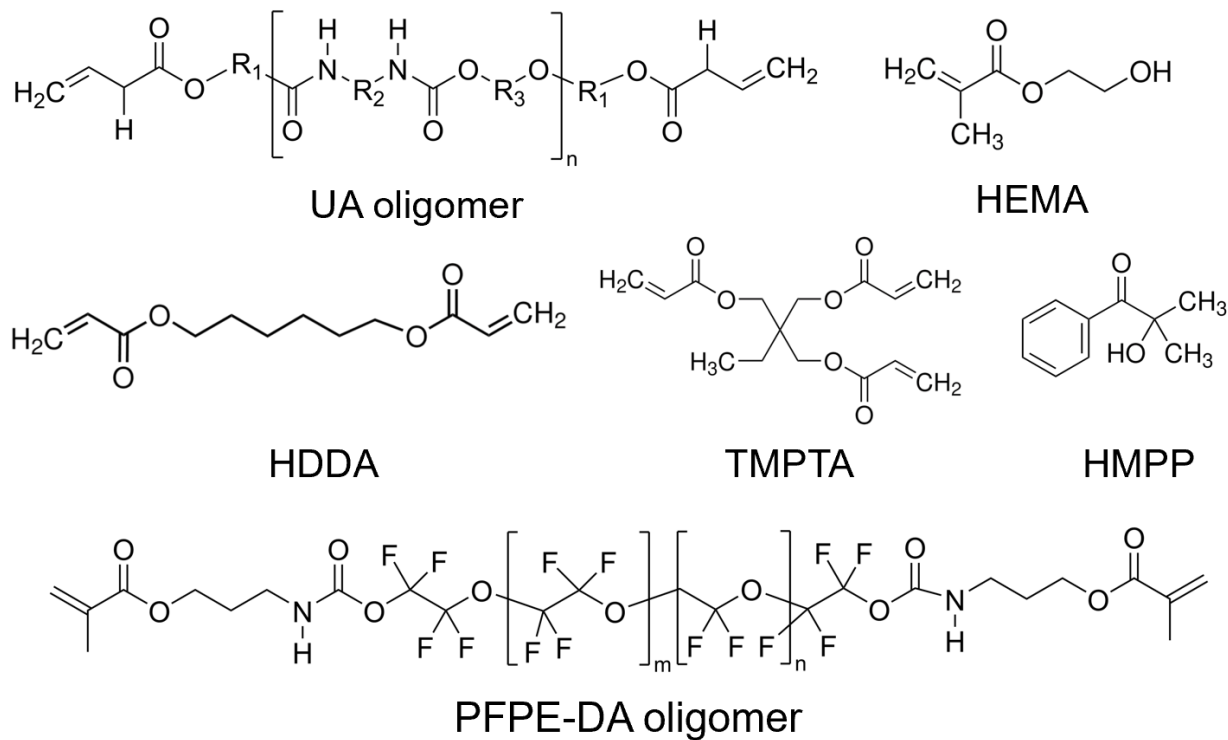

**Figure S2.** Chemical structures of components in the precursors of PUA and PFPE-DA. The PUA precursor consists of a UA oligomer, HEMA, HDDA, TMPTA, and HMPP. The PFPE precursor contains a PFPE-DA oligomer, with HMPP added as a photoinitiator.
